# Supplementary material for: Challenges in clinical diagnosis of Clade I Mpox: Highlighting the need for enhanced diagnostic approaches
Source: PubMed Central journal article supplement (PMC11226010; doi:10.1371/journal.pntd.0012087), 2024-06-24
Supplement: pntd.0012087.s002.pdf [file pntd.0012087.s002.pdf]

**Appendix 2 – Summary of question characteristics and accuracy score**

| <b>Question</b> | <b>Accuracy (%)</b> | <b>Diagnosis</b> | <b>Lesion type(s)</b> |
|-----------------|---------------------|------------------|-----------------------|
| Question 4      | 25                  | Mpox             | Multiple              |
| Question 19     | 43.75               | Mpox             | Multiple              |
| Question 5      | 50                  | Varicella        | Single                |
| Question 16     | 56.25               | Varicella        | Multiple              |
| Question 11     | 62.5                | Mpox             | Multiple              |
| Question 9      | 68.75               | Varicella        | Multiple              |
| Question 13     | 68.75               | Mpox             | Single                |
| Question 18     | 68.75               | Mpox             | Single                |
| Question 20     | 75                  | Mpox             | Single                |
| Question 6      | 81.25               | Mpox             | Single                |
| Question 8      | 81.25               | Mpox             | Multiple              |
| Question 10     | 81.25               | Mpox             | Multiple              |
| Question 14     | 93.75               | Mpox             | Multiple              |
| Question 17     | 93.75               | Mpox             | Single                |
| Question 7      | 100                 | Mpox             | Single                |
| Question 12     | 100                 | Mpox             | Single                |
| Question 15     | 100                 | Mpox             | Single                |
